# Supplementary material for: Self-Reported Gastrointestinal Symptoms in Type 2 Diabetes Improve With an Intensive Lifestyle Intervention: Results From the Action for Health in Diabetes (Look AHEAD) Clinical Trial
Source: PubMed Central journal article supplement — Clin Diabetes. 2015 Oct;33(4):181–8. doi: 10.2337/diaclin.33.4.181 (PMC4608270; doi:10.2337/diaclin.33.4.181), 2015-10
Supplement: supp_33.4.181_NEIBERG_SUPP_TABLE.pdf [file supp_33.4.181_NEIBERG_SUPP_TABLE.pdf]

**SUPPLEMENTARY TABLE 1. Look AHEAD Clinical Sites, Staff, and Federal Sponsors****Clinical Sites**

The Johns Hopkins Medical Institutions: Frederick L. Brancati, MD, MHS;<sup>1</sup> Lee Swartz;<sup>2</sup> Lawrence Cheskin, MD;<sup>3</sup> Jeanne M. Clark, MD, MPH;<sup>3</sup> Kerry Stewart, EdD;<sup>3</sup> Richard Rubin, PhD;<sup>3</sup> Jean Arceci, RN; Suzanne Ball; Jeanne Charleston, RN; Danielle Diggins; Mia Johnson; Joyce Lambert; Kathy Michalski, RD; Dawn Jiggetts; and Chanchai Sapun.

Pennington Biomedical Research Center: George A. Bray, MD;<sup>1</sup> Kristi Rau;<sup>2</sup> Allison Strate, RN;<sup>2</sup> Frank L. Greenway, MD;<sup>3</sup> Donna H. Ryan, MD;<sup>3</sup> Donald Williamson, PhD;<sup>3</sup> Brandi Armand, LPN; Jennifer Arceneaux; Amy Bachand, MA; Michelle Begnaud, LDN, RD, CDE; Betsy Berhard; Elizabeth Caderette; Barbara Cerniauskas, LDN, RD, CDE; David Creel, MA; Diane Crow; Crystal Duncan; Helen Guay, LDN, LPC, RD; Carolyn Johnson, Lisa Jones; Nancy Kora; Kelly LaFleur; Kim Landry; Missy Lingle; Jennifer Perault; Cindy Puckett; Mandy Shipp, RD; Marisa Smith; and Elizabeth Tucker.

The University of Alabama at Birmingham: Cora E. Lewis, MD, MSPH;<sup>1</sup> Sheikilya Thomas MPH;<sup>2</sup> Monika Safford, MD;<sup>3</sup> Vicki DiLillo, PhD; Charlotte Bragg, MS, RD, LD; Amy Dobelstein; Stacey Gilbert, MPH; Stephen Glasser, MD;<sup>3</sup> Sara Hannum, MA; Anne Hubbell, MS; Jennifer Jones, MA; DeLavallade Lee; Ruth Luketic, MA, MBA, MPH; L. Christie Oden; Janet Raines, MS; Cathy Roche, RN, BSN; Janet Truman; Nita Webb, MA; Casey Azuero, MPH; Jane King, MLT; and Andre Morgan.

Harvard Center: *Massachusetts General Hospital*: David M. Nathan, MD;<sup>1</sup> Enrico Cagliero, MD;<sup>3</sup> Kathryn Hayward, MD;<sup>3</sup> Heather Turgeon, RN, BS, CDE;<sup>2</sup> Linda Delahanty, MS, RD;<sup>3</sup> Ellen Anderson, MS, RD;<sup>3</sup> Laurie Bissett, MS, RD; Valerie Goldman, MS, RD; Virginia Harlan, MSW; Theresa Michel, DPT, DSc, CCS; Mary Larkin, RN; Christine Stevens, RN; Kylee Miller, BA; Jimmy Chen, BA; Karen Blumenthal, BA; Gail Winning, BA; Rita Tsay, RD; Helen Cyr, RD; and Maria Pinto. *Joslin Diabetes Center*: Edward S. Horton, MD;<sup>1</sup> Sharon D. Jackson, MS, RD, CDE;<sup>2</sup> Osama Hamdy, MD, PhD;<sup>3</sup> A. Enrique Caballero, MD;<sup>3</sup> Sarah Bain, BS; Elizabeth Bovaird, BSN, RN; Barbara Fagnoli, MS, RD; Jeanne Spellman, BS, RD; Ann Goebel-Fabbri, PhD; Lori Lambert, MS, RD; Sarah Ledbury, MEd, RD; Maureen Malloy, BS; and Kerry Ovalle, MS, RCEP, CDE. *Beth Israel Deaconess Medical Center*: George Blackburn, MD, PhD;<sup>1</sup> Christos Mantzoros, MD, DSc;<sup>3</sup> Ann McNamara, RN; and Kristina Spellman, RD.

University of Colorado Health Sciences Center: James O. Hill, PhD;<sup>1</sup> Marsha Miller, MS, RD;<sup>2</sup> Brent Van Dorsten, PhD;<sup>3</sup> Judith Regensteiner, PhD;<sup>3</sup> Ligia Coelho, BS; Paulette Cohrs, RN, BSN; Susan Green; April Hamilton, BS, CCRC; Jere Hamilton, BA; Eugene Leshchinskiy; Lindsey Munkwitz, BS; Loretta Rome, TRS; Terra Worley, BA; Kirstie Craul, RD, CDE; and Sheila Smith, BS.

Baylor College of Medicine: John P. Foreyt, PhD;<sup>1</sup> Rebecca S. Reeves, DrPH, RD;<sup>2</sup> Henry Pownall, PhD;<sup>3</sup> Ashok Balasubramanyam, MBBS;<sup>3</sup> Peter Jones, MD;<sup>3</sup> Michele Burrington, RD, RN; Chu-Huang Chen, MD, PhD;<sup>3</sup> Allyson Clark Gardner, MS, RD; Molly Gee, MEd, RD; Sharon Griggs; Michelle Hamilton; Veronica Holley; Jayne Joseph, RD; Julieta Palencia, RN; Jennifer Schmidt; and Carolyn White.

The University of Tennessee Health Science Center: *University of Tennessee East*: Karen C. Johnson, MD, MPH;<sup>1</sup> Carolyn Gresham, RN;<sup>2</sup> Stephanie Connelly, MD, MPH;<sup>3</sup> Amy Brewer, RD, MS; Mace Coday, PhD; Lisa Jones, RN; Lynne Lichtermann, RN, BSN; Shirley Vosburg, RD, MPH; and J. Lee Taylor, MEd, MBA. *University of Tennessee Downtown*: Abbas E. Kitabchi, PhD, MD;<sup>1</sup> Ebenezer Nyenwe, MD;<sup>3</sup> Helen Lambeth, RN, BSN;<sup>2</sup> Amy Brewer, MS, RD, LDN; Debra Clark, LPN; Andrea Crisler, MT; Debra Force, MS, RD, LDN; Donna Green, RN; and Robert Kores, PhD.

University of Minnesota: Robert W. Jeffery, PhD;<sup>1</sup> Carolyn Thorson, CCRP;<sup>2</sup> John P. Bantle, MD;<sup>3</sup> J. Bruce Redmon, MD;<sup>3</sup> Richard S. Crow, MD;<sup>3</sup> Scott Crow, MD;<sup>3</sup> Susan K. Raatz, PhD, RD;<sup>3</sup> Kerrin Brelje, MPH, RD; Carolyn Campbell; Jeanne Carls, MEd; Tara Carmean-Mihm, BA; Julia Devonish, MS; Emily Finch, MA; Anna Fox, MA; Elizabeth Hoelscher, MPH, RD, CHES; La Donna James; Vicki A. Maddy, BS, RD; Therese Ockenden, RN; Birgitta I. Rice, MS, RPh, CHES; Tricia Skarphol, BS; Ann D. Tucker, BA; Mary Susan Voeller, BA; and Cara Walcheck, BS, RD.

St. Luke's Roosevelt Hospital Center: Xavier Pi-Sunyer, MD;<sup>1</sup> Jennifer Patricio, MS;<sup>2</sup> Stanley Heshka, PhD;<sup>3</sup> Carmen Pal, MD;<sup>3</sup> Lynn Allen, MD; Lolline Chong, BS, RD; Marci Gluck, PhD; Diane Hirsch, RNC, MS, CDE; Mary Anne Holowaty, MS, CN; Michelle Horowitz, MS, RD; Nancy Rau, MS, RD, CDE; and Dori Brill Steinberg, BS.

University of Pennsylvania: Thomas A. Wadden, PhD;<sup>1</sup> Barbara J. Maschak-Carey, MSN, CDE;<sup>2</sup> Robert I. Berkowitz, MD;<sup>3</sup> Seth Braunstein, MD, PhD;<sup>3</sup> Gary Foster, PhD;<sup>3</sup> Henry Glick, PhD;<sup>3</sup> Shiriki Kumanyika, PhD, RD, MPH;<sup>3</sup> Stanley S. Schwartz, MD;<sup>3</sup> Michael Allen, RN; Yuliis Bell; Johanna Brock; Susan Brozena, MD; Ray Carvajal, MA; Helen Chomentowski; Canice Crerand, PhD; Renee Davenport; Andrea Diamond, MS, RD; Anthony Fabricatore, PhD; Lee Goldberg, MD; Louise Hesson, MSN, CRNP; Thomas Hudak, MS; Nayyar Iqbal, MD; LaShanda Jones-Corneille, PhD; Andrew Kao, MD; Robert Kuehnel, PhD; Patricia Lipschutz, MSN; and Monica Mullen, RD, MPH.

University of Pittsburgh: John M. Jakicic, PhD;<sup>1</sup> David E. Kelley, MD;<sup>1</sup> Jacqueline Wesche-Thobaben, RN, BSN, CDE;<sup>2</sup> Lewis H. Kuller, MD, DrPH;<sup>3</sup> Andrea Kriska, PhD;<sup>3</sup> Amy D. Otto, PhD, RD, LDN;<sup>3</sup> Lin Ewing, PhD, RN;<sup>3</sup> Mary Korytkowski, MD;<sup>3</sup> Daniel Edmundowicz, MD;<sup>3</sup> Monica E. Yamamoto, DrPH, RD, FADA;<sup>3</sup> Rebecca Danchenko, BS; Barbara Elyneczy; David O. Garcia, MS; George A. Grove, MS; Patricia H. Harper, MS, RD, LDN; Susan Harrier, BS; Nicole L. Helbling, MS, RN; Diane Ives, MPH; Juliet Mancino, MS, RD, CDE, LDN; Anne Mathews, PhD, RD, LDN; Tracey Y. Murray, BS; Joan R. Ritchea; Susan Urda, BS, CTR; and Donna L. Wolf, PhD.

TABLE CONTINUED ON P. S2 →

**SUPPLEMENTARY TABLE 1. Look AHEAD Clinical Sites, Staff, and Federal Sponsors, continued from p. S1**

**Clinical Sites**

The Miriam Hospital/Brown Medical School: Rena R. Wing, PhD;<sup>1</sup> Renee Bright, MS;<sup>2</sup> Vincent Pera, MD;<sup>3</sup> John Jakicic, PhD;<sup>3</sup> Deborah Tate, PhD;<sup>3</sup> Amy Gorin, PhD;<sup>3</sup> Kara Gallagher, PhD;<sup>3</sup> Amy Bach, PhD; Barbara Bancroft, RN, MS; Anna Bertorelli, MBA, RD; Richard Carey, BS; Tatum Charron, BS; Heather Chenot, MS; Kimberley Chula-Maguire, MS; Pamela Coward, MS, RD; Lisa Cronkite, BS; Julie Currin, MD; Maureen Daly, RN; Caitlin Egan, MS; Erica Ferguson, BS, RD; Linda Foss, MPH; Jennifer Gauvin, BS; Don Kieffer, PhD; Lauren Lessard, BS; Deborah Maier, MS; J.P. Massaro, BS; Tammy Monk, MS; Rob Nicholson, PhD; Erin Patterson, BS; Suzanne Phelan, PhD; Hollie Raynor, PhD, RD; Douglas Raynor, PhD; Natalie Robinson, MS, RD; Deborah Robles; and Jane Tavares, BS.

The University of Texas Health Science Center at San Antonio: Steven M. Haffner, MD;<sup>1</sup> Helen P. Hazuda, PhD;<sup>1</sup> Maria G. Montez, RN, MSHP, CDE;<sup>2</sup> Carlos Lorenzo, MD;<sup>3</sup> Charles F. Coleman, MS, RD; Domingo Granado, RN; Kathy Hathaway, MS, RD; Juan Carlos Isaac, RC, BSN; Nora Ramirez, RN, BSN; and Ronda Saenz, MS, RD.

VA Puget Sound Health Care System/University of Washington: Steven Kahn, MB, ChB;<sup>1</sup> Brenda Montgomery, RN, MS, CDE;<sup>2</sup> Robert Knopp, MD;<sup>3</sup> Edward Lipkin, MD;<sup>3</sup> Dace Trence, MD;<sup>3</sup> Terry Barrett, BS; Joli Bartell, BA; Diane Greenberg, PhD; Anne Murillo, BS; Betty Ann Richmond, MEd; Jolanta Socha, BS; April Thomas, MPH, RD; and Alan Wesley, BA.

Southwestern American Indian Center, Phoenix, Ariz., and Shiprock, N.M.: William C. Knowler, MD, DrPH;<sup>1</sup> Paula Bolin, RN, MC;<sup>2</sup> Tina Killean, BS;<sup>2</sup> Cathy Manus, LPN;<sup>3</sup> Jonathan Krakoff, MD;<sup>3</sup> Jeffrey M. Curtis, MD, MPH;<sup>3</sup> Justin Glass, MD;<sup>3</sup> Sara Michaels, MD;<sup>3</sup> Peter H. Bennett, MB, FRCP;<sup>3</sup> Tina Morgan;<sup>3</sup> Shandiin Begay, MPH; Paul Bloomquist, MD; Teddy Costa, BS; Bernadita Fallis, RN, RHIT, CCS; Jeanette Hermes, MS, RD; Diane F. Hollowbreast; Ruby Johnson; Maria Meacham, BSN, RN, CDE; Julie Nelson, RD; Carol Percy, RN; Patricia Poorthunder; Sandra Sangster; Nancy Scurlock, MSN, ANP-C, CDE; Leigh A. Shovestull, RD, CDE; Janelia Smiley; Katie Toledo, MS, LPC; Christina Tomchee, BA; and Darryl Tonemah, PhD.

University of Southern California: Anne Peters, MD;<sup>1</sup> Valerie Ruelas, MSW, LCSW;<sup>2</sup> Siran Ghazarian Sengardi, MD;<sup>2</sup> Kathryn (Mandy) Graves Hillstrom, EdD, RD, CDE; Kati Konersman, MA, RD, CDE; and Sara Serafin-Dokhan.

**Coordinating Center**

Wake Forest University: Mark A. Espeland, PhD;<sup>1</sup> Judy L. Bahnson, BA, CCRP;<sup>3</sup> Lynne E. Wagenknecht, DrPH;<sup>3</sup> David Reboussin, PhD;<sup>3</sup> W. Jack Rejeski, PhD;<sup>3</sup> Alain G. Bertoni, MD, MPH;<sup>3</sup> Wei Lang, PhD;<sup>3</sup> Michael S. Lawlor, PhD;<sup>3</sup> David Lefkowitz, MD;<sup>3</sup> Gary D. Miller, PhD;<sup>3</sup> Patrick S. Reynolds, MD;<sup>3</sup> Paul M. Ribisl, PhD;<sup>3</sup> Mara Vitolins, DrPH;<sup>3</sup> Haiying Chen, PhD;<sup>3</sup> Delia S. West, PhD;<sup>3</sup> Lawrence M. Friedman, MD;<sup>3</sup> Brenda L. Craven, MS, CCRP;<sup>2</sup> Kathy M. Dotson, BA;<sup>2</sup> Amelia Hodges, BS, CCRP;<sup>2</sup> Carrie C. Williams, MA, CCRP;<sup>2</sup> Andrea Anderson, MS; Jerry M. Barnes, MA; Mary Barr; Daniel P. Beavers, PhD; Tara Beckner; Cralen Davis, MS; Thania Del Valle-Fagan, MD; Patricia A. Feeney, MS; Candace Goode; Jason Griffin, BS; Lea Harvin, BS; Patricia Hogan, MS; Sarah A. Gaussoin, MS; Mark King, BS; Kathy Lane, BS; Rebecca H. Neiberg, MS; Michael P. Walkup, MS; Karen Wall, AAS; and Terri Windham.

**Central Resources Centers**

DXA Reading Center, University of California at San Francisco: Michael Nevitt, PhD;<sup>1</sup> Ann Schwartz, PhD;<sup>2</sup> John Shepherd, PhD;<sup>3</sup> Michaela Rahrst; Lisa Palermo, MS, MA; Susan Ewing, MS; Cynthia Hayashi; and Jason Maeda, MPH.

Central Laboratory, Northwest Lipid Metabolism and Diabetes Research

Laboratories: Santica M. Marcovina, PhD, ScD;<sup>1</sup> Jessica Chmielewski;<sup>2</sup> and Vinod Gaur, PhD.<sup>4</sup>

ECG Reading Center, EPICARE, Wake Forest University School of Medicine: Elsayed Z. Soliman, MD, MSc, MS;<sup>1</sup> Ronald J. Prineas, MD, PhD;<sup>1</sup> Charles Campbell;<sup>2</sup> Zhu-Ming Zhang, MD;<sup>3</sup> Teresa Alexander; Lisa Keasler; Susan Hensley; and Yabing Li, MD.

Diet Assessment Center, University of South Carolina, Arnold School of Public Health, Center for Research in Nutrition and Health Disparities: Robert Moran, PhD.<sup>1</sup>

Hall-Foushee Communications, Inc.: Richard Foushee, PhD; and Nancy J. Hall, MA.

**Federal Sponsors**

National Institute of Diabetes and Digestive and Kidney Diseases (NIDDK): Mary Evans, PhD; Barbara Harrison, MS; Van S. Hubbard, MD, PhD; Susan Z.Yanovski, MD; and Robert Kuczmariski, PhD.

National Heart, Lung, and Blood Institute (NHLBI): Lawton S. Cooper, MD, MPH; and Peter Kaufman, PhD, FABMR.

Centers for Disease Control and Prevention (CDC): Edward W. Gregg, PhD; David F. Williamson, PhD; and Ping Zhang, PhD.

<sup>1</sup>Principal investigator

<sup>2</sup>Program coordinator

<sup>3</sup>Co-investigator

All other Look AHEAD staff members are listed alphabetically by site.
